# Supplementary material for: Multisensory Stimulation and Priming (MuSSAP) in 4-10 Months Old Infants with a Unilateral Brain Lesion: A Pilot Randomised Clinical Trial
Source: Hindawi journal article supplement (doi:10.1155/2023/8128407), 2023-01-06
Supplement: f1 [file 8128407.f1.zip]

## Appendix 2: Individual developmental trajectories of *time to self-initiated goal-directed movement*

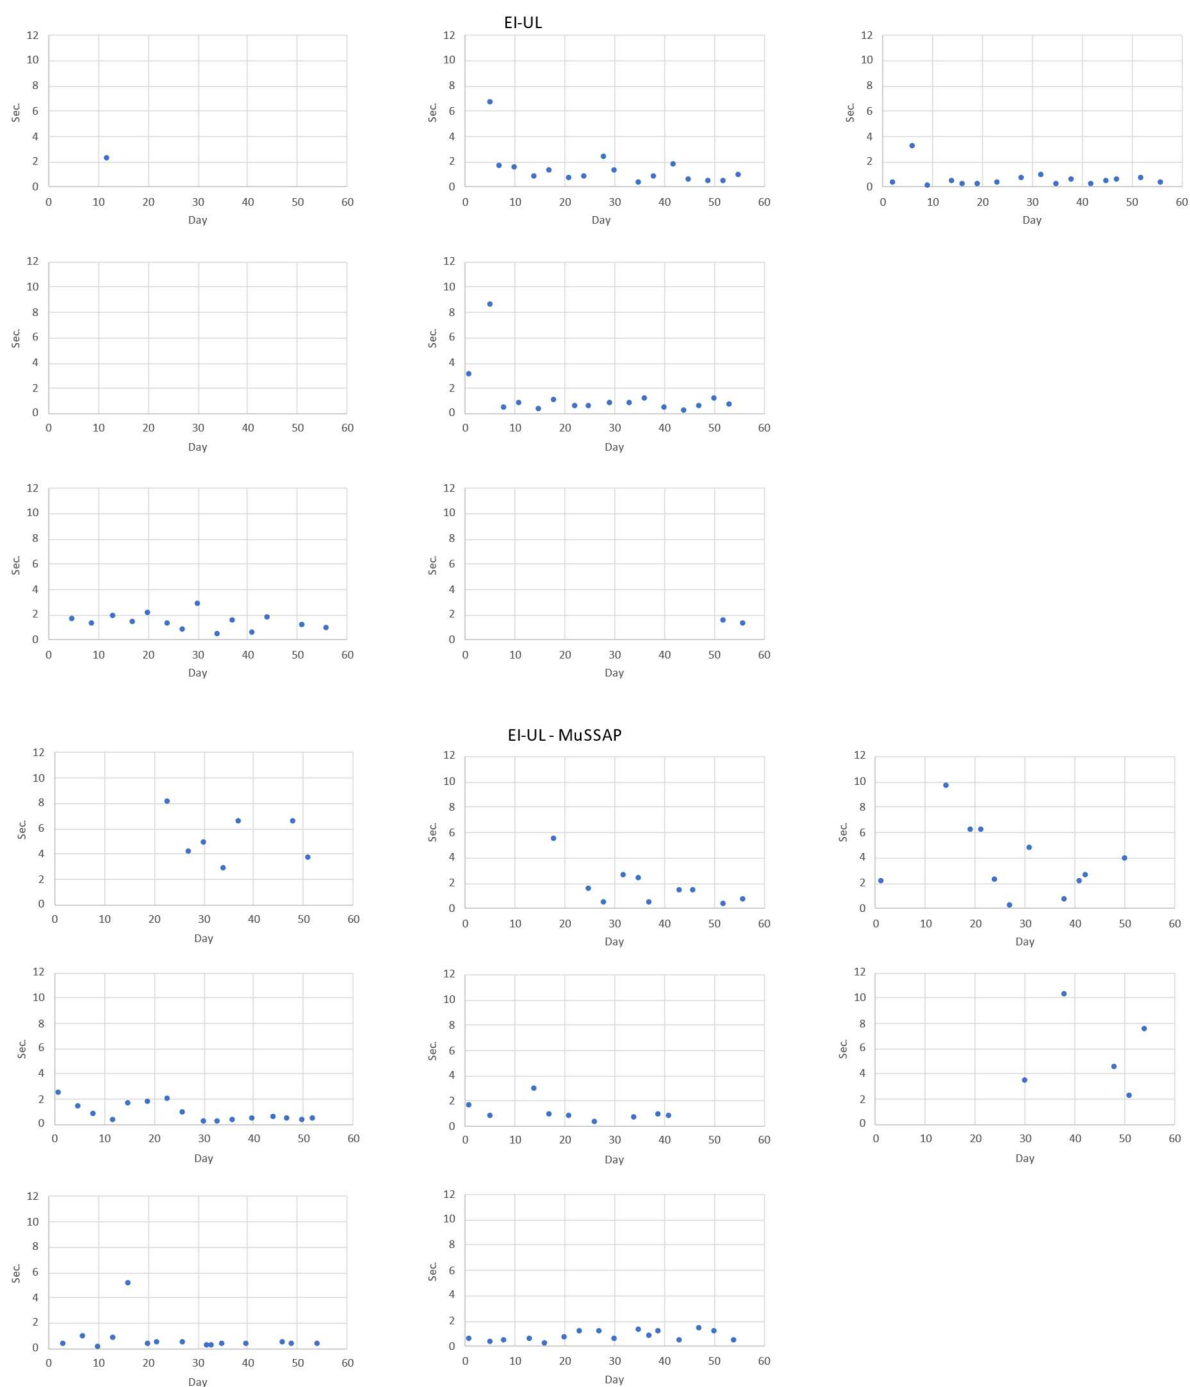

**Fig Appendix 2.** Individual developmental trajectories of *time to self-initiated goal-directed movement* for infants receiving EI-UL and infants receiving EI-UL – MuSSAP training
